# Supplementary material for: Circular RNAs in the human brain are tailored to neuron identity and neuropsychiatric disease
Source: PubMed Central journal article supplement (PMC10507039; doi:10.1038/s41467-023-40348-0), 2023-09-18
Supplement: 41467_2023_40348_MOESM3_ESM.pdf [file 41467_2023_40348_MOESM3_ESM.pdf]

## **Description of Additional Supplementary Files**

File Name: Supplementary Data 1

Description: Summary for samples and RNAseq experiment.

File Name: Supplementary Data 2

Description: Summary for RNase R treated RNAseq experiments.

File Name: Supplementary Data 3

Description: Cell-specific circRNAs and their host genes.

File Name: Supplementary Data 4

Description: qPCR validation of select circRNAs.

File Name: Supplementary Data 5

Description: Functional enrichment of host genes of all circRNAs and cell-specific circRNAs (BH-adjusted  $P < 0.05$ , two-sided Fisher's exact test).

File Name: Supplementary Data 6

Description: Diseases enriched for host genes of all circRNAs and cell-specific circRNAs (BH-adjusted  $P < 0.05$ , two-sided Fisher's exact test).

File Name: Supplementary Data 7

Description: circRNAs differentially expressed in dopamine neurons between ILB and control ( $P < 0.05$ , two-sided Wald test)
